# Supplementary material for: Nine scoring models for short-term mortality in alcoholic hepatitis: cross-validation in a biopsy-proven cohort
Source: PubMed Central journal article supplement — Aliment Pharmacol Ther. 2014 Feb 12;39(7):721–32. doi: 10.1111/apt.12654 (PMC4015369; doi:10.1111/apt.12654), 2014-02-12

**Figure S1.** Scatter plots of admission score values for prognostic scores in alcoholic hepatitis correlated with 30- (a) and 90-day (b) mortality. Solid lines represent originally published cut-offs. Dotted lines represent optimal cut-points as determined by the receiver operating curve coordinates. For ABIC optimal low (yielding max sensitivity) and high (yielding max specificity) cut-off values were determined, similarly to the original description of the model <sup>14</sup>. Optimal MELD, GASH and low ABIC cut-offs within our cohort fitted those originally published <sup>14, 16, 20</sup>. Sensitivity/specificity (%) for each cut-off value are shown in parentheses.

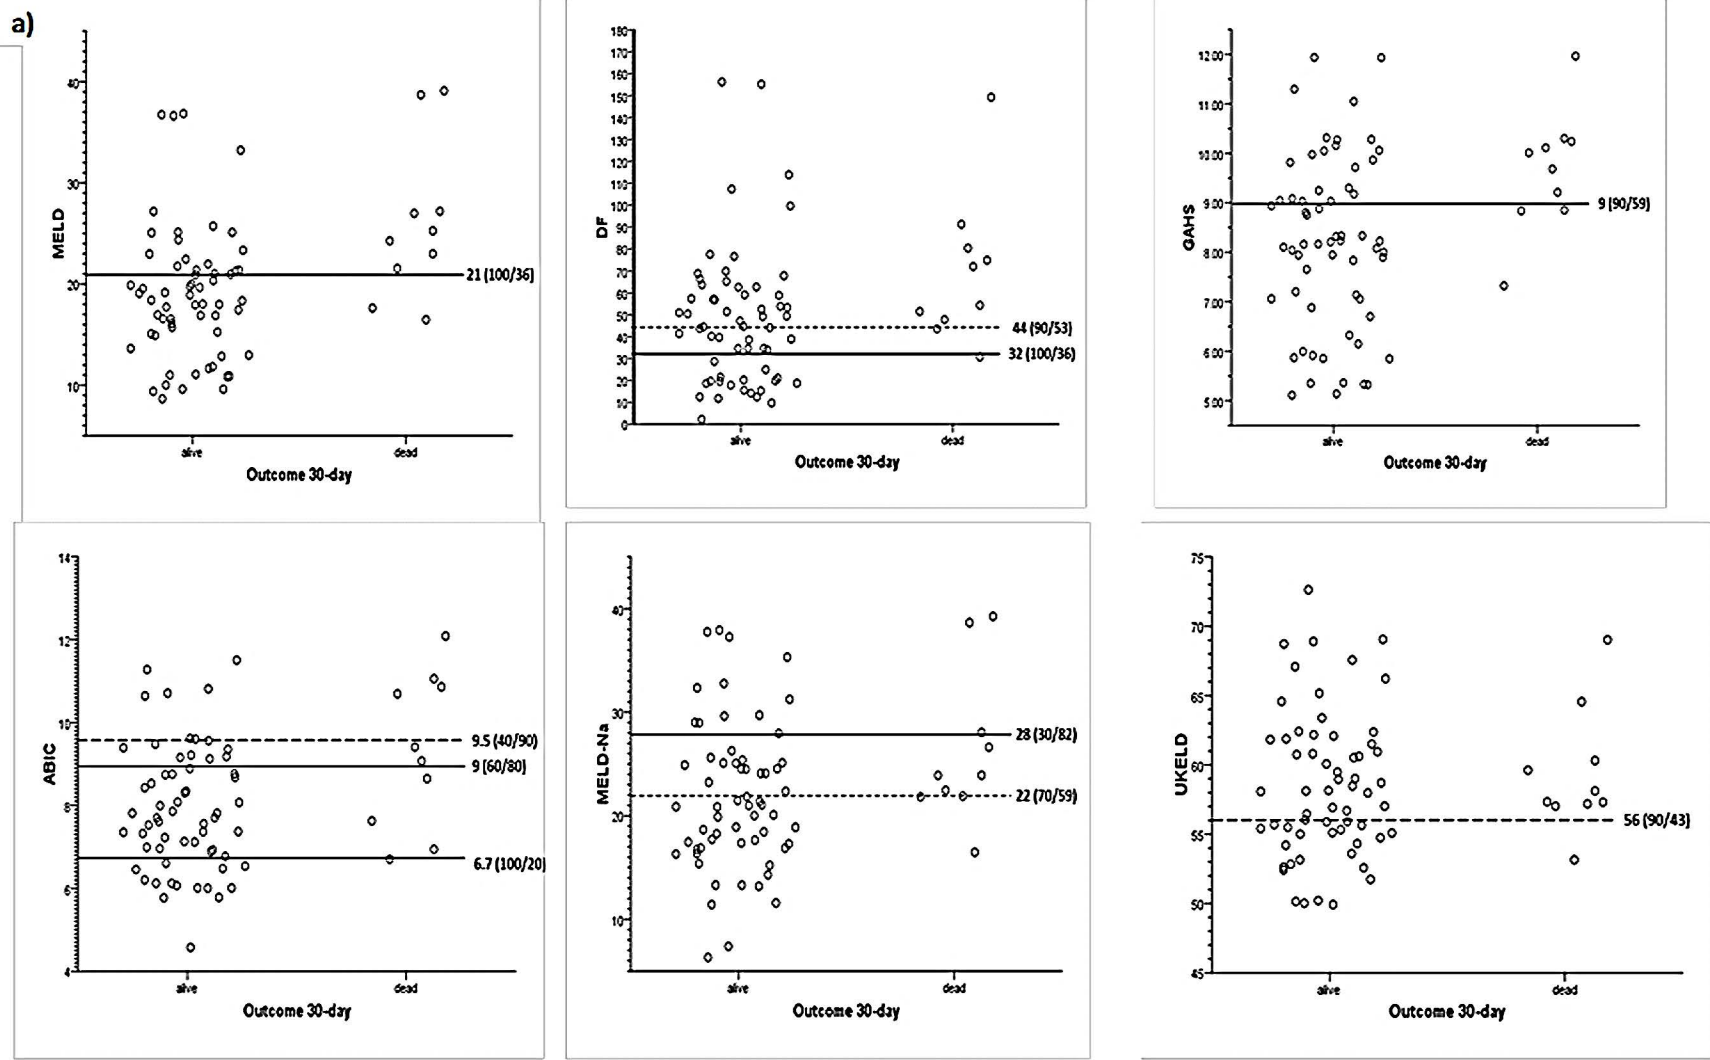

b)

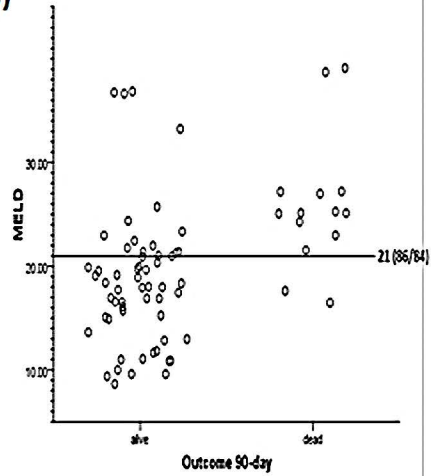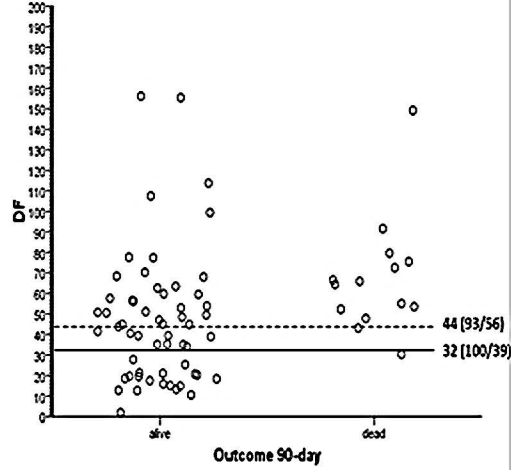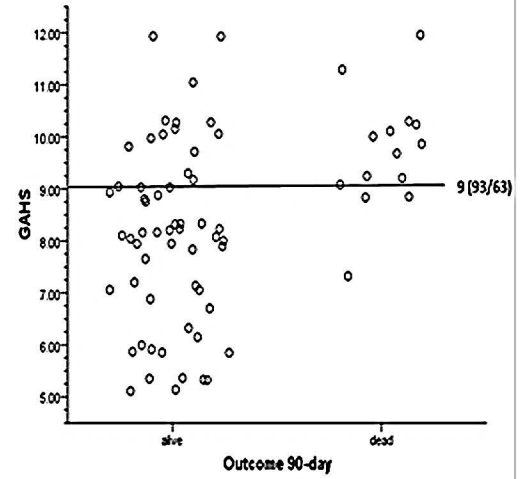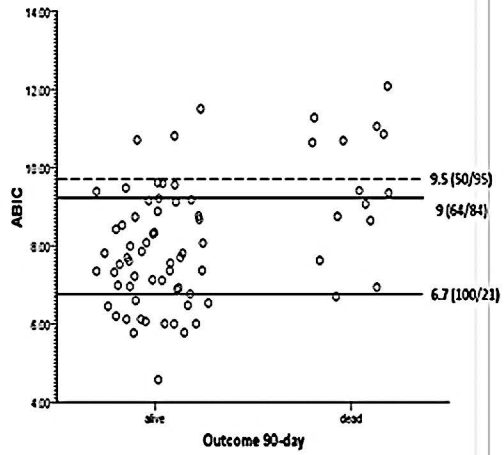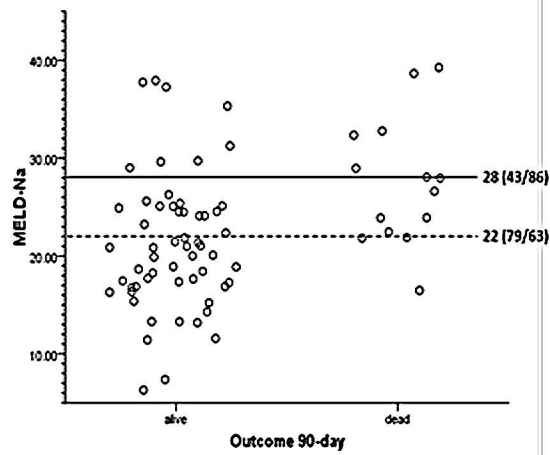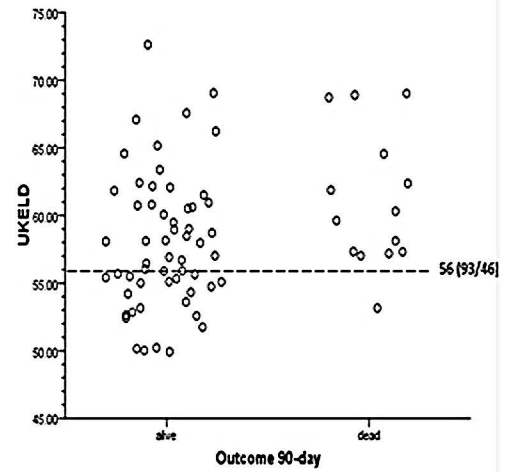

Supplement: apt0039-0721-sd1.pdf [file apt0039-0721-sd1.pdf]
